# Supplementary material for: Genome-wide association study of the age of onset of type 1 diabetes reveals HTATIP2 as a novel T cell regulator
Source: PubMed Central journal article supplement (PMC9930890; doi:10.3389/fimmu.2023.1101488), 2023-02-01
Supplement: DataSheet_1.pdf [file DataSheet_1.pdf]

## Online Supplement

### **Genome-wide association study of the age of onset of type 1 diabetes reveals HTATIP2 as a novel T cell regulator**

Christopher J. Cardinale<sup>1†</sup>, Xiao Chang<sup>1†</sup>, Zhi Wei<sup>2</sup>, Hui-Qi Qu<sup>1</sup>, Jonathan P. Bradfield<sup>3</sup>, Constantin Polychronakos<sup>4</sup>, and Hakon Hakonarson<sup>1,5\*</sup>

<sup>1</sup> Center for Applied Genomics, Children's Hospital of Philadelphia, Philadelphia, Pa., United States

<sup>2</sup> Department of Computer Science, New Jersey Institute of Technology, Newark, N.J., United States

<sup>3</sup> Quantinuum Research LLC, Wayne, Pa., United States

<sup>4</sup> Department of Pediatrics, McGill University, Montreal, Quebec, Canada

<sup>5</sup> Department of Pediatrics, Perelman School of Medicine at the University of Pennsylvania, Philadelphia, Pa., United States

† These authors contributed equally.

#### **\* Correspondence:**

Hakon Hakonarson, MD, PhD

[hakonarson@chop.edu](mailto:hakonarson@chop.edu)

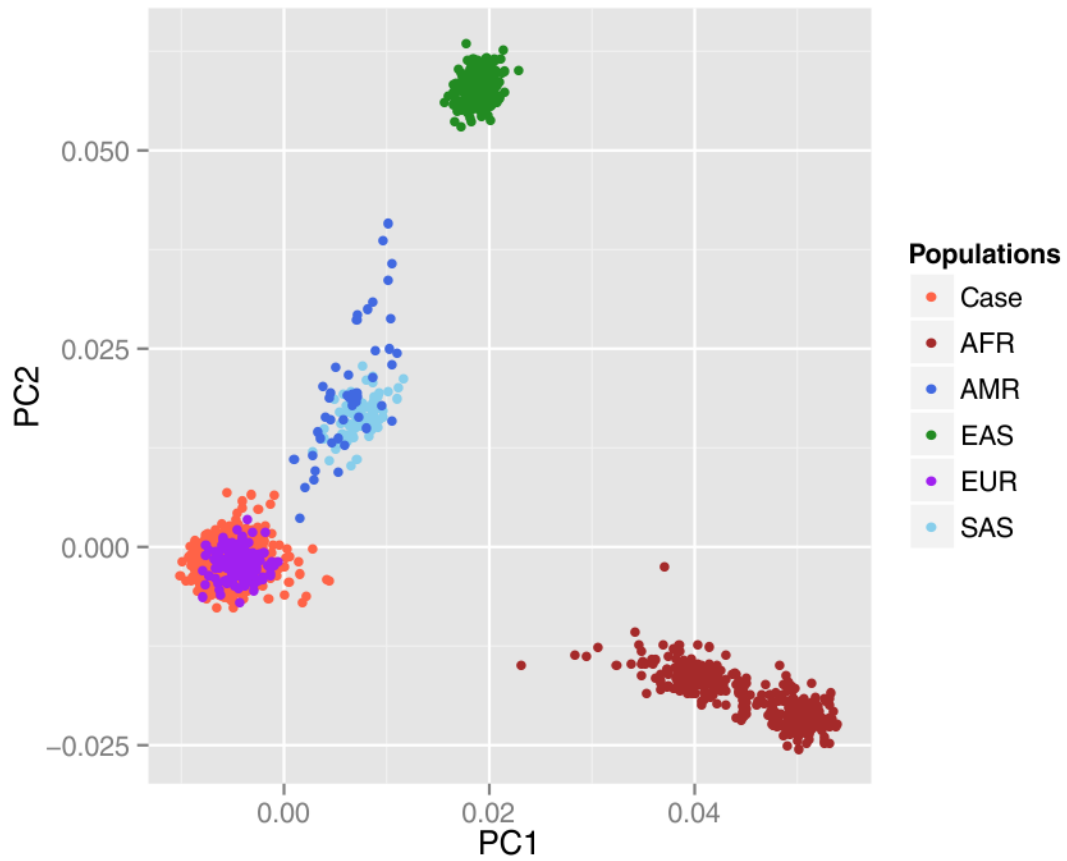

**Supplementary Figure S1.** Principal components analysis of the discovery cohort. Case subjects are within the European population. Other 1000 Genomes Project populations are shown. Case = type 1 diabetes subjects. AFR = African. AMR = Native American. EAS = East Asian. EUR = European. SAS = South Asian.

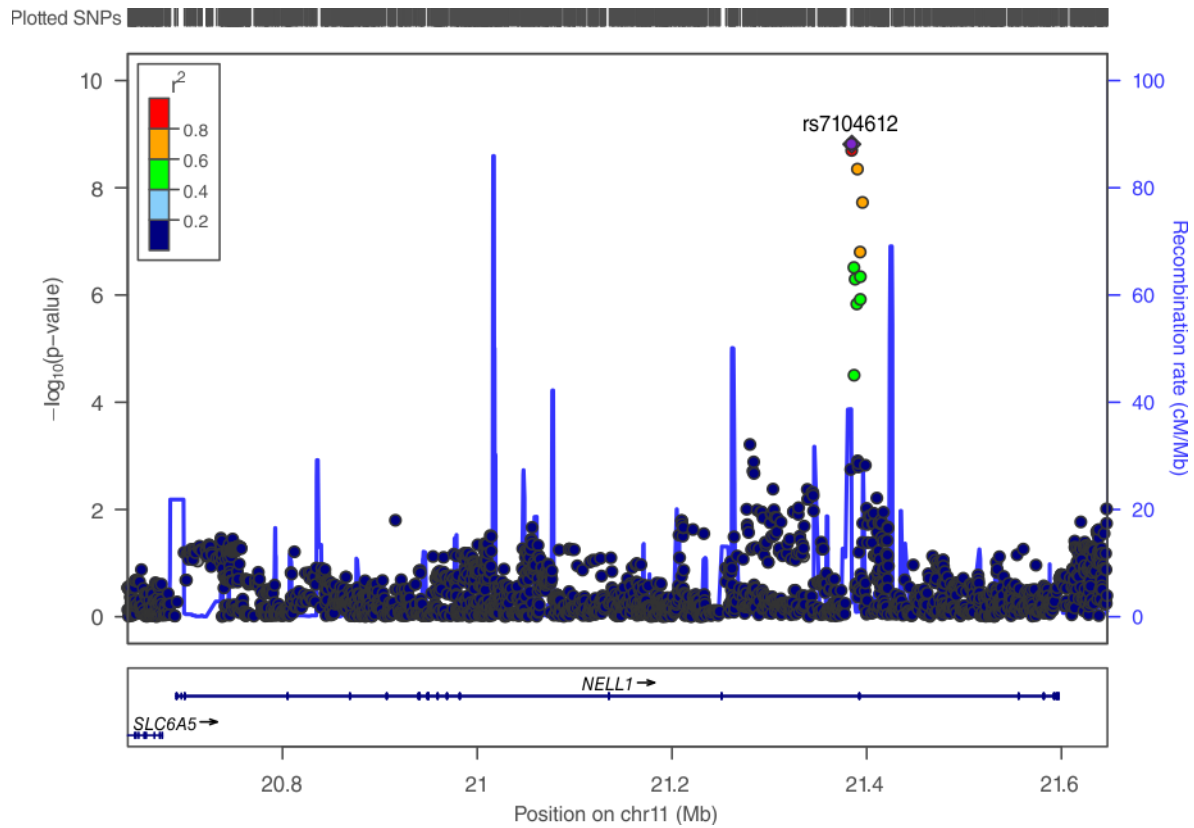

**Supplementary Figure S2.** Regional association plot of the meta-analysis (generated in LocusZoom) identifying the lead SNP rs7104612 within a haplotype block containing exon 14 of the *NELL1* gene. SNPs in linkage disequilibrium with the lead SNP are color-coded by the  $r^2$  of the LD.

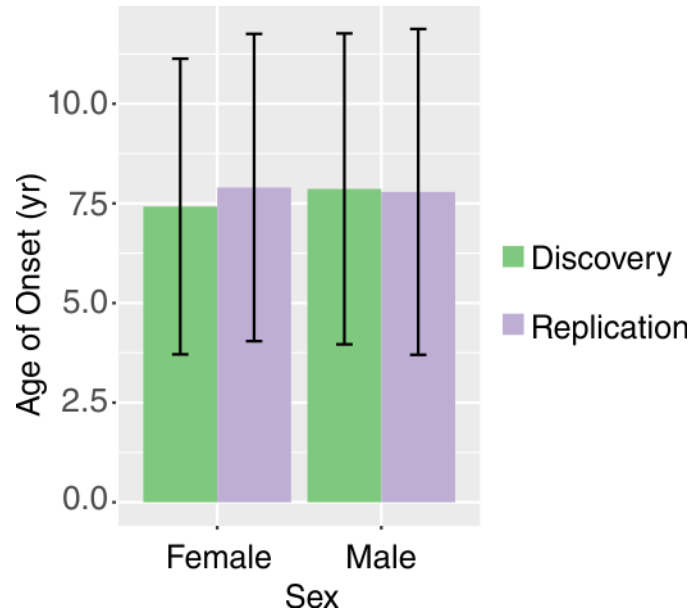

**Supplementary Figure S3.** The age of onset for subjects in the discovery and replication cohorts by sex (average with standard deviation). There are no statistically significant differences.



## siRNA Sequences

|               |                                                                                                                  |
|---------------|------------------------------------------------------------------------------------------------------------------|
| Non-targeting | AUG UAU UGG CCU GUA UUA G                                                                                        |
| HTATIP2       | GGG UAC CAC CAG AGG GAA A<br>CUU UCA AGG UCA UGA UGU U<br>GCA GAA UAA AUC CGU CUU U<br>UCG ACG AGG AAG CUU AUA A |
| PRMT3         | GAA GAA AGC AGU UAU UCC A<br>GCA UAU AGA UUG CCA UAC G<br>CAG CAU GGU UCA UAA ACA U<br>CCC AAU GGA CUC AGU GAA A |
| FANCF         | GGG AGG AGU UGC ACA AUA G<br>GGU CAA CGU UUG CAC UAU G<br>UAA CUG CCC UGG AGA CCU G<br>CUU AUU AGC UCU UCG UAG U |
| SVIP          | CCU UAA GUG CAA UG CUA A<br>GUA AGG AUC UUU GUA GUA A<br>ACU UAU UAG AGA ACG AUC A<br>CAA GUG GGC UUC AUC AAU U  |

## PCR Primers

|                |                                       |
|----------------|---------------------------------------|
| HTATIP2 qPCR F | ATG ACT ACG CCT CTG CCT TTC A         |
| HTATIP2 qPCR R | TCG GTC AAC ACG AAC AAA TCC C         |
| MAP3K2 RT fwd  | CAG ATT CTG GAG GGT GTC CAT TAT TTG   |
| MAP3K2 RT rev  | CCT AGT TTG ACG TTG CCT GTT GAA TCT   |
| IL6ST RT fwd   | ACA GAT GAA GGT GGG AAG GAT GGT C     |
| IL6ST RT rev   | GGT GAC CAC TGG GCA ATA TGA CTC TT    |
| RORA RT fwd    | ATC ATC AGG AAT CCA TTA TGG TGT CAT T |
| RORA RT rev    | ACG AGG ACA GGA GTA GGT GGC ATT       |
| RICTOR RT fwd  | CGA GCA TGC ATT GCC ATT ATC TGT       |
| RICTOR RT rev  | TGG CAA TCG ATC ACA TTT TTC AAG A     |
| IKZF2 RT fwd   | AGC CGT TCA AAT GTC CTT TCT GTA GC    |
| IKZF2 RT rev   | CGT TCC TTG TGC TCC TCC AGT GA        |
| REL RT fwd     | AAA GAC TGC AGA GAC GGC TAC TAT GA    |
| REL RT rev     | GAT TGA TTC CTG CCT TTA TTC TTG TA    |

|                |                                       |
|----------------|---------------------------------------|
| ELK4 RT fwd    | TGG CTC GTC TCT GGG GGA TTC           |
| ELK4 RT rev    | CCC TCA ATC CTG CCC ACT GTC A         |
| PIK3C2A RT fwd | ATG AGG AGA TGG CAG CTT TTT GTC       |
| PIK3C2A RT rev | ATG TTT CTT TGT GCT GTG ACT GGA CTT A |
| NFAT5 ver 2 F  | CAA TGA GTC AGA CAA GCG GTG GTG       |
| NFAT5 ver 2 R  | ATG GTA GGG CTG GAA GAG GTG GTA A     |
